# Supplementary material for: Towards more accurate solubility measurements with real time monitoring: a carvedilol case study
Source: Royal Society of Chemistry journal article supplement (doi:10.1039/d1nj01349a), 2021-01-01
Supplement: d1nj01349a1.pdf [file d1nj01349a1.pdf]

## Towards more accurate solubility measurements with real time monitoring: a carvedilol case study

Dóra Csicsák,<sup>a</sup> Enikő Borbás,<sup>\*b</sup> Szabina Kádár,<sup>b</sup> Petra Tőzsér,<sup>b</sup> Péter Bagi,<sup>b</sup> Hajnalka Pataki,<sup>b</sup> Bálint Sinkó,<sup>c</sup> Krisztina Takács-Novák<sup>a</sup> and Gergely Völgyi<sup>a</sup>

Journal: New Journal of Chemistry

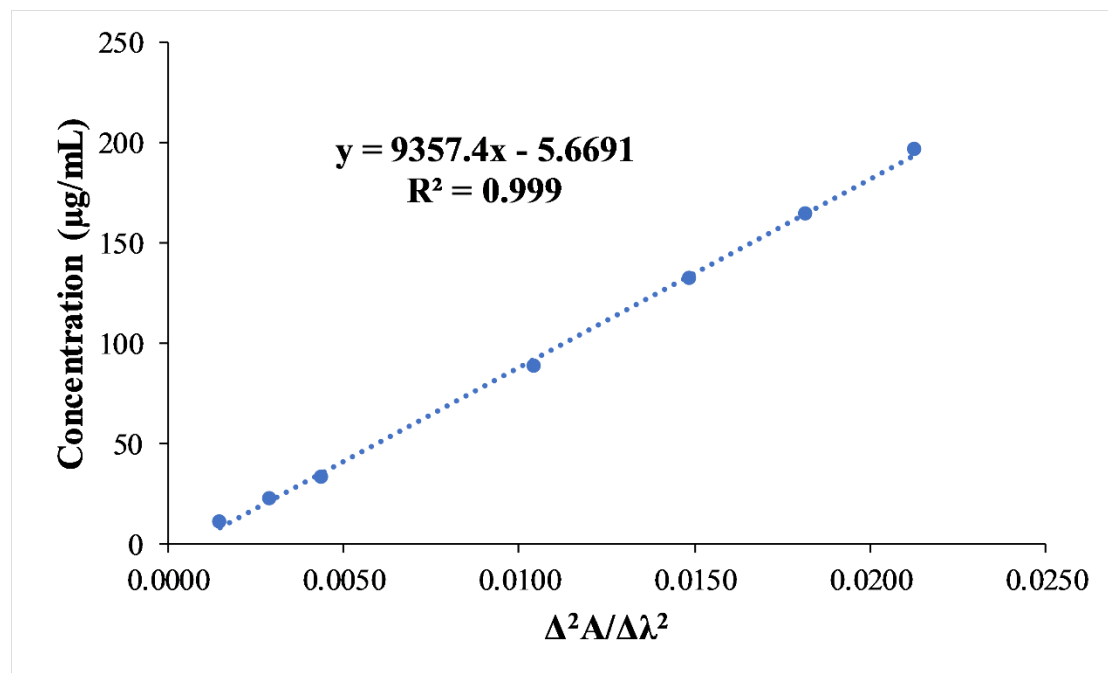

Supplementary Figure 1. Calibration curve of carvedilol at pH=6.5

### Stability measurements

HPLC-MS was performed on an Agilent Technologies 1200 Series HPLC - Agilent Technologies 6130 Quadrupole MS in positive and negative electrospray mode; column: Phenomenex Kinetex C18 2.6 µm 100A 50 × 3.00 mm; column temperature: 40°C; flow rate: 0.5 mL/min; A eluent: water (0.1% HCOONH<sub>4</sub>); B eluent: MeCN (8% water, 0.1% HCOONH<sub>4</sub>); gradient: 10% eluent B from 0 to 1.0 min, linear gradient to 90% eluent B from 1.0 min to 6.0 min, 90% eluent B from 6.0 min to 10.0 min, followed by a linear gradient back to 10% eluent B from 10.0 to 15.0 min; UV detector:  $\alpha$  280 nm.



**Supplementary Table 1: HPLC data for the stability tests of carvedilol Form I and II.**

| Entry | Sample               | Carvedilol (%) | Impurity A (%) | Impurity B (%) | Impurity C (%) |
|-------|----------------------|----------------|----------------|----------------|----------------|
| 1     | Form I. pH=4 BR      | 97.5           | 1.8            | 0.4            | 0.3            |
| 2     | Form I. pH=4 BR+KCl  | 98.1           | 1.5            | 0.2            | 0.2            |
| 3     | Form I. pH=6 BR      | 99.4           | n.d.           | n.d.           | 0.6            |
| 4     | Form I. pH=6 BR+KCl  | 98.5           | 1.1            | 0.2            | 0.2            |
| 5     | Form II. pH=4 BR     | 98.5           | 0.8            | 0.4            | 0.3            |
| 6     | Form II. pH=4 BR+KCl | 98.0           | 1.7            | 0.1            | 0.2            |
| 7     | Form II. pH=6 BR     | 98.8           | 1.0            | 0.1            | 0.1            |
| 8     | Form II. pH=6 BR+KCl | 99.4           | 0.6            | n.d.           | n.d.           |

### Representative HPLC chromatograms

Form I. pH=4 BR+KCl (Supplementary Table 1, Entry 2)

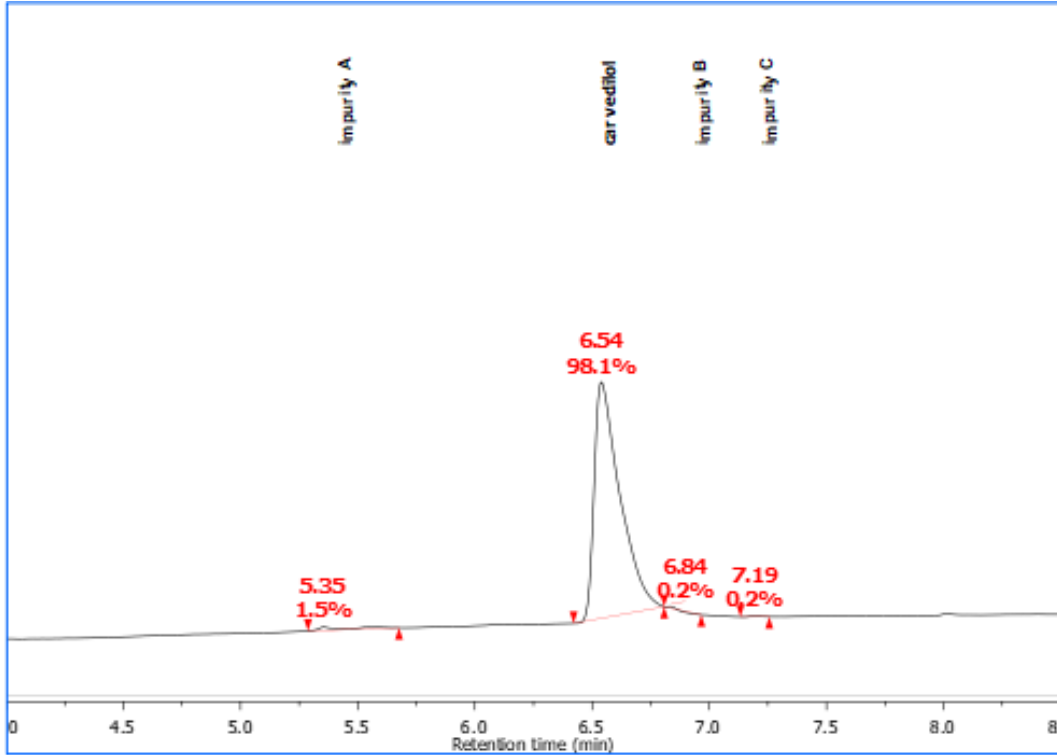

Form II. pH=4 BR+KCl (Supplementary Table 1, Entry 6)

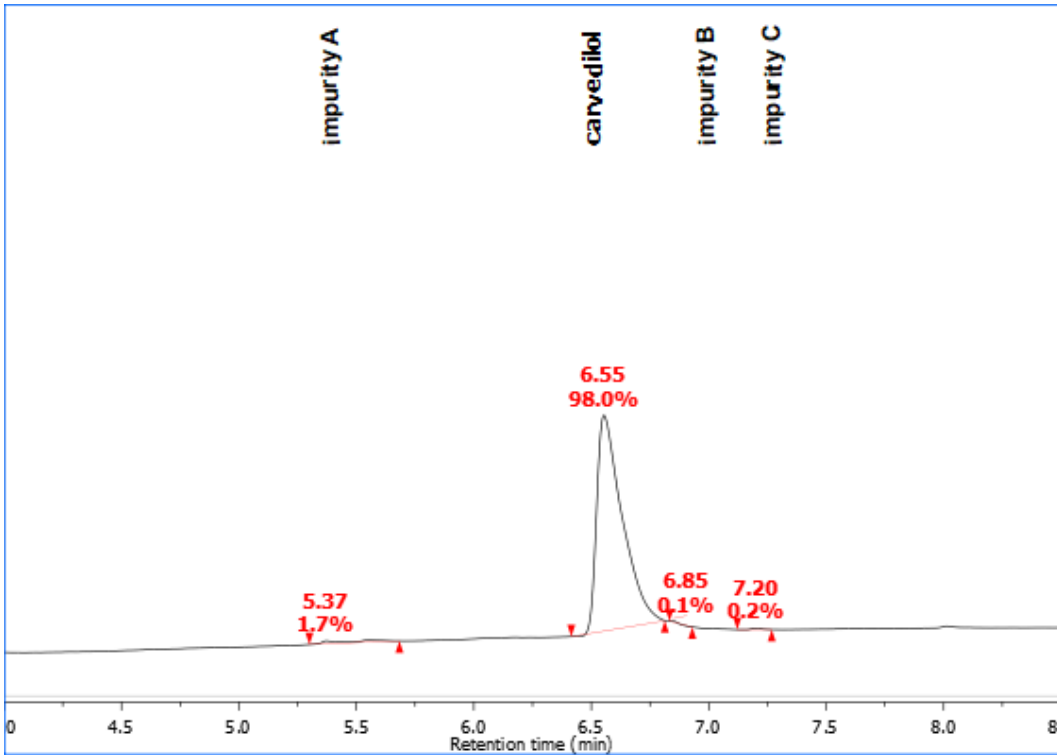

### carvedilol standard

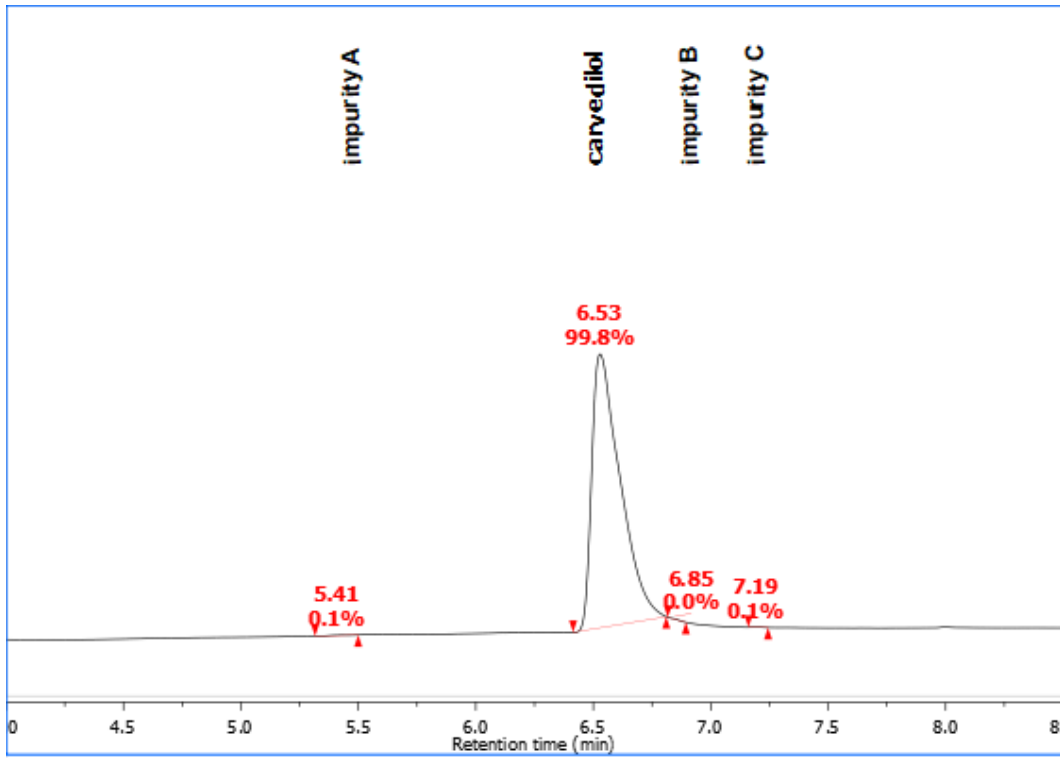

### Representative mass spectra of carvedilol.

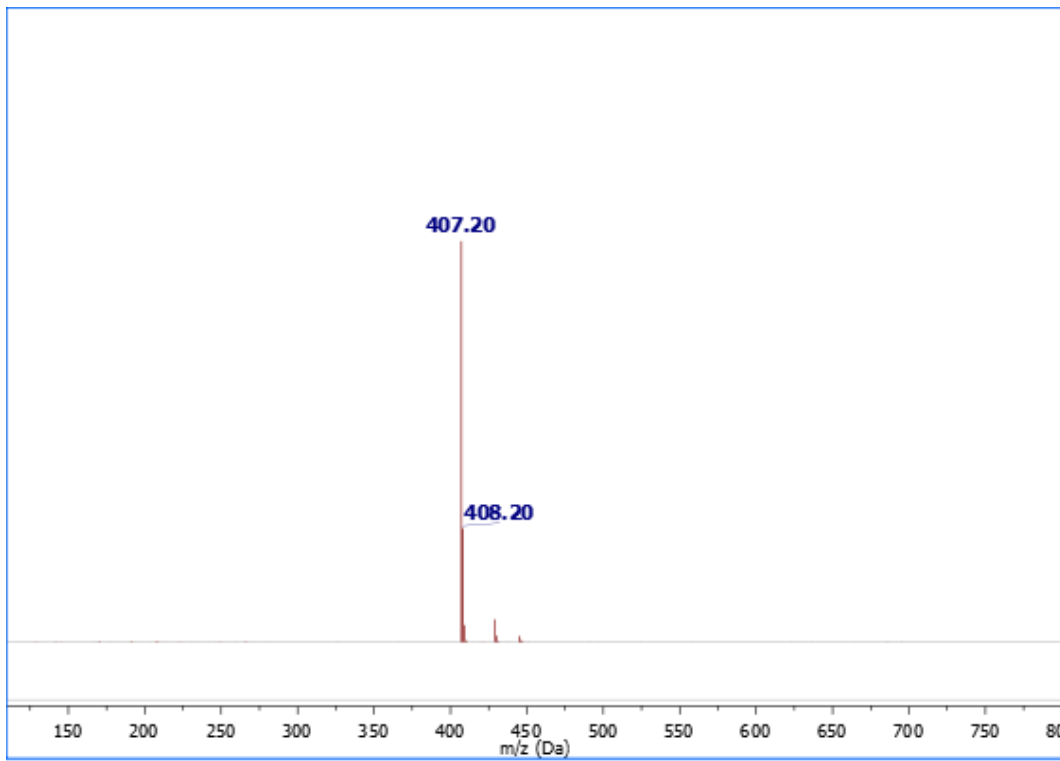

Based on the HPLC-UV and HPLC-MS measurements no significant detectable degradation of carvedilol (<2.5%) was observed.
